# Supplementary material
Source: publisher site journal article supplement (https://www.spandidos-publications.com/3141/downloadSupplementary)
Supplement: Supplementary file 1 [file downloadSupplementary]

## Sheet: AKI-24h VS. AKI-Pre
Table SIA. Differentially expressed proteins in the AKI-24h/AKI-Pre comparison.
	N	Unused	Total	% Cov	Accession #	Name	Peptides(95%)	AKI-24h/CON-24h	P-Value
1	801	2	2	24.1	sp|P60953|CDC42_HUMAN	Cell division control protein 42 homolog OS=Homo sapiens GN=CDC42 PE=1 SV=2	1	99.0832	0.0127
2	766	2	2.02	11.6	sp|Q9HB21|PKHA1_HUMAN	Pleckstrin homology domain-containing family A member 1 OS=Homo sapiens GN=PLEKHA1 PE=1 SV=2	1	85.5067	0.0128
3	765	2	2.02	16.7	sp|Q13867|BLMH_HUMAN	Bleomycin hydrolase OS=Homo sapiens GN=BLMH PE=1 SV=1	1	77.983	0.0129
4	255	10.24	21.23	98	sp|P02042|HBD_HUMAN	Hemoglobin subunit delta OS=Homo sapiens GN=HBD PE=1 SV=2	42	45.2898	0.0026
5	137	17.42	17.5	58.1	sp|P32119|PRDX2_HUMAN	Peroxiredoxin-2 OS=Homo sapiens GN=PRDX2 PE=1 SV=5	11	35.6451	<0.00001
6	508	4.05	4.06	27.5	sp|P52565|GDIR1_HUMAN	Rho GDP-dissociation inhibitor 1 OS=Homo sapiens GN=ARHGDIA PE=1 SV=3	3	31.3329	0.0176
7	16	53.81	53.58	72.7	sp|P01009|A1AT_HUMAN	Alpha-1-antitrypsin OS=Homo sapiens GN=SERPINA1 PE=1 SV=3	86	29.3765	0.003
8	107	20.93	20.92	55.2	sp|P00915|CAH1_HUMAN	Carbonic anhydrase 1 OS=Homo sapiens GN=CA1 PE=1 SV=2	38	26.3027	0.0455
9	75	26.63	26.66	20.5	sp|Q8WZ75|ROBO4_HUMAN	Roundabout homolog 4 OS=Homo sapiens GN=ROBO4 PE=1 SV=1	22	23.1206	0.0019
10	15	54.67	54.54	36.8	sp|Q07075|AMPE_HUMAN	Glutamyl aminopeptidase OS=Homo sapiens GN=ENPEP PE=1 SV=3	34	21.0863	<0.00001
11	27	41.16	42.12	51.8	sp|P01011|AACT_HUMAN	Alpha-1-antichymotrypsin OS=Homo sapiens GN=SERPINA3 PE=1 SV=2	60	19.2309	<0.00001
12	72	27.28	27.59	66.7	sp|P02647|APOA1_HUMAN	Apolipoprotein A-I OS=Homo sapiens GN=APOA1 PE=1 SV=1	21	18.8799	0.0338
13	207	12.88	12.99	38.7	sp|P09210|GSTA2_HUMAN	Glutathione S-transferase A2 OS=Homo sapiens GN=GSTA2 PE=1 SV=4	8	18.5353	0.001
14	317	7.92	8.04	42.4	sp|P30046|DOPD_HUMAN	D-dopachrome decarboxylase OS=Homo sapiens GN=DDT PE=1 SV=3	4	18.5353	0.0011
15	34	38.23	38	73.6	sp|P01859|IGHG2_HUMAN	Ig gamma-2 chain C region OS=Homo sapiens GN=IGHG2 PE=1 SV=2	83	17.378	0.0049
16	76	26.4	26.41	50.3	sp|Q03154|ACY1_HUMAN	Aminoacylase-1 OS=Homo sapiens GN=ACY1 PE=1 SV=1	16	17.378	0.0405
17	261	10.09	10.21	24	sp|Q96KP4|CNDP2_HUMAN	Cytosolic non-specific dipeptidase OS=Homo sapiens GN=CNDP2 PE=1 SV=2	7	17.0608	0.0177
18	384	6.1	6.48	46.7	sp|P10599|THIO_HUMAN	Thioredoxin OS=Homo sapiens GN=TXN PE=1 SV=3	3	16.4437	0.0308
19	149	16.23	16.35	66.9	sp|P00441|SODC_HUMAN	Superoxide dismutase [Cu-Zn] OS=Homo sapiens GN=SOD1 PE=1 SV=2	11	16.1436	<0.00001
20	128	18.49	19.72	29	sp|P15289|ARSA_HUMAN	Arylsulfatase A OS=Homo sapiens GN=ARSA PE=1 SV=3	15	15.8489	0.0041
21	148	16.29	16.45	36.4	sp|P04040|CATA_HUMAN	Catalase OS=Homo sapiens GN=CAT PE=1 SV=3	9	15.417	<0.00001
22	47	34.28	34.29	61.4	sp|P06727|APOA4_HUMAN	Apolipoprotein A-IV OS=Homo sapiens GN=APOA4 PE=1 SV=3	20	15.2757	<0.00001
23	91	23.88	25.75	59.4	sp|P60174|TPIS_HUMAN	Triosephosphate isomerase OS=Homo sapiens GN=TPI1 PE=1 SV=3	14	15.2757	0.0005
24	233	11.54	11.61	43.4	sp|P22352|GPX3_HUMAN	Glutathione peroxidase 3 OS=Homo sapiens GN=GPX3 PE=1 SV=2	7	15.1356	0.0267
25	42	35.82	36.52	27.6	sp|P10253|LYAG_HUMAN	Lysosomal alpha-glucosidase OS=Homo sapiens GN=GAA PE=1 SV=4	34	14.4544	<0.00001
26	315	8	8	27.6	sp|P07148|FABPL_HUMAN	Fatty acid-binding protein, liver OS=Homo sapiens GN=FABP1 PE=1 SV=1	4	14.3219	0.009
27	663	2.17	2.2	11.7	sp|Q13790|APOF_HUMAN	Apolipoprotein F OS=Homo sapiens GN=APOF PE=1 SV=2	3	14.1906	0.0222
28	163	15.56	16.42	37	sp|Q93088|BHMT1_HUMAN	Betaine--homocysteine S-methyltransferase 1 OS=Homo sapiens GN=BHMT PE=1 SV=2	11	13.5519	0.0057
29	170	15.21	16.01	29.3	sp|P22891|PROZ_HUMAN	Vitamin K-dependent protein Z OS=Homo sapiens GN=PROZ PE=1 SV=2	8	13.0617	0.0121
30	399	6	6.31	14	sp|P04066|FUCO_HUMAN	Tissue alpha-L-fucosidase OS=Homo sapiens GN=FUCA1 PE=1 SV=4	4	12.942	0.0012
31	680	2.04	2.16	17.9	sp|O95861|BPNT1_HUMAN	3'(2'),5'-bisphosphate nucleotidase 1 OS=Homo sapiens GN=BPNT1 PE=1 SV=1	3	12.2462	0.0252
32	13	62.55	64.36	43.4	sp|P15144|AMPN_HUMAN	Aminopeptidase N OS=Homo sapiens GN=ANPEP PE=1 SV=4	63	12.0226	<0.00001
33	153	16.19	16.6	54.8	sp|P02749|APOH_HUMAN	Beta-2-glycoprotein 1 OS=Homo sapiens GN=APOH PE=1 SV=3	21	11.9124	0.0033
34	271	9.55	11.72	57.6	sp|P09211|GSTP1_HUMAN	Glutathione S-transferase P OS=Homo sapiens GN=GSTP1 PE=1 SV=2	16	11.8032	0.0033
35	343	7.3	9.51	23.8	sp|P07900|HS90A_HUMAN	Heat shock protein HSP 90-alpha OS=Homo sapiens GN=HSP90AA1 PE=1 SV=5	5	11.5878	0.0455
36	219	12.11	12.2	21.7	sp|O43707|ACTN4_HUMAN	Alpha-actinin-4 OS=Homo sapiens GN=ACTN4 PE=1 SV=2	6	10.8643	0.0011
37	142	16.88	17.05	45.8	sp|P07195|LDHB_HUMAN	L-lactate dehydrogenase B chain OS=Homo sapiens GN=LDHB PE=1 SV=2	10	8.9536	0.0005
38	407	6	6	36	sp|Q9BVM4|GGACT_HUMAN	Gamma-glutamylaminecyclotransferase OS=Homo sapiens GN=GGACT PE=1 SV=2	3	8.7902	0.0013
39	98	22.94	25.69	34.2	sp|P43652|AFAM_HUMAN	Afamin OS=Homo sapiens GN=AFM PE=1 SV=1	13	8.6298	0.003
40	78	26.08	28.48	29.2	sp|P54802|ANAG_HUMAN	Alpha-N-acetylglucosaminidase OS=Homo sapiens GN=NAGLU PE=1 SV=2	20	8.3946	0.0331
41	862	1.43	1.59	8.3	sp|Q16610|ECM1_HUMAN	Extracellular matrix protein 1 OS=Homo sapiens GN=ECM1 PE=1 SV=2	1	7.9433	0.0272
42	88	24.33	26.57	50.2	sp|P06733|ENOA_HUMAN	Alpha-enolase OS=Homo sapiens GN=ENO1 PE=1 SV=2	15	7.8705	0.001
43	375	6.4	6.43	28.4	sp|P00491|PNPH_HUMAN	Purine nucleoside phosphorylase OS=Homo sapiens GN=PNP PE=1 SV=2	3	7.7983	0.01
44	31	39.86	39.87	48.5	sp|P07602|SAP_HUMAN	Prosaposin OS=Homo sapiens GN=PSAP PE=1 SV=2	113	7.656	0.0007
45	32	39.69	40.14	24.7	sp|P01023|A2MG_HUMAN	Alpha-2-macroglobulin OS=Homo sapiens GN=A2M PE=1 SV=3	18	7.5858	<0.00001
46	172	15	15.06	55.2	sp|P62937|PPIA_HUMAN	Peptidyl-prolyl cis-trans isomerase A OS=Homo sapiens GN=PPIA PE=1 SV=2	9	7.5858	0.0009
47	20	50.69	52.04	23.1	sp|O43451|MGA_HUMAN	Maltase-glucoamylase, intestinal OS=Homo sapiens GN=MGAM PE=1 SV=5	30	7.379	<0.00001
48	724	2	4.99	15.5	sp|P22455|FGFR4_HUMAN	Fibroblast growth factor receptor 4 OS=Homo sapiens GN=FGFR4 PE=1 SV=2	3	6.9823	0.0245
49	221	12.07	12.15	39.7	sp|P30041|PRDX6_HUMAN	Peroxiredoxin-6 OS=Homo sapiens GN=PRDX6 PE=1 SV=3	8	6.9183	0.0021
50	378	6.3	6.56	16.3	sp|P19827|ITIH1_HUMAN	Inter-alpha-trypsin inhibitor heavy chain H1 OS=Homo sapiens GN=ITIH1 PE=1 SV=3	5	6.9183	0.0252
51	162	15.57	15.66	54.6	sp|P30086|PEBP1_HUMAN	Phosphatidylethanolamine-binding protein 1 OS=Homo sapiens GN=PEBP1 PE=1 SV=3	12	6.7298	0.0047
52	33	39.05	38.69	69.2	sp|P00738|HPT_HUMAN	Haptoglobin OS=Homo sapiens GN=HP PE=1 SV=1	34	6.6069	<0.00001
53	87	24.47	25.28	48.7	sp|P00558|PGK1_HUMAN	Phosphoglycerate kinase 1 OS=Homo sapiens GN=PGK1 PE=1 SV=3	14	6.0256	0.0061
54	93	23.63	23.65	44.5	sp|P04406|G3P_HUMAN	Glyceraldehyde-3-phosphate dehydrogenase OS=Homo sapiens GN=GAPDH PE=1 SV=3	20	6.0256	0.0083
55	124	19.23	19.26	34.7	sp|P15309|PPAP_HUMAN	Prostatic acid phosphatase OS=Homo sapiens GN=ACPP PE=1 SV=3	13	5.4954	<0.00001
56	252	10.37	13.66	50.3	sp|Q99497|PARK7_HUMAN	Protein deglycase DJ-1 OS=Homo sapiens GN=PARK7 PE=1 SV=2	7	5.445	<0.00001
57	507	4.05	6.07	11	sp|P16930|FAAA_HUMAN	Fumarylacetoacetase OS=Homo sapiens GN=FAH PE=1 SV=2	3	5.445	0.0017
58	74	26.87	28.3	28.9	sp|P08473|NEP_HUMAN	Neprilysin OS=Homo sapiens GN=MME PE=1 SV=2	19	5.2481	<0.00001
59	59	29.19	29.23	34.8	sp|P19440|GGT1_HUMAN	Gamma-glutamyltranspeptidase 1 OS=Homo sapiens GN=GGT1 PE=1 SV=2	20	5.2	0.0171
60	141	16.89	19.52	37.7	sp|Q13510|ASAH1_HUMAN	Acid ceramidase OS=Homo sapiens GN=ASAH1 PE=1 SV=5	11	4.9204	0.0161
61	28	41.06	43.13	32.6	sp|P27487|DPP4_HUMAN	Dipeptidyl peptidase 4 OS=Homo sapiens GN=DPP4 PE=1 SV=2	21	4.7424	<0.00001
62	123	19.3	19.38	59	sp|P07288|KLK3_HUMAN	Prostate-specific antigen OS=Homo sapiens GN=KLK3 PE=1 SV=2	24	4.4875	0.0001
63	273	9.51	9.57	30.2	sp|Q99574|NEUS_HUMAN	Neuroserpin OS=Homo sapiens GN=SERPINI1 PE=1 SV=1	7	4.4875	0.0113
64	159	15.85	15.99	26.9	sp|P16870|CBPE_HUMAN	Carboxypeptidase E OS=Homo sapiens GN=CPE PE=1 SV=1	9	4.4055	<0.00001
65	173	14.98	15.21	29.7	sp|Q9UHL4|DPP2_HUMAN	Dipeptidyl peptidase 2 OS=Homo sapiens GN=DPP7 PE=1 SV=3	8	4.4055	0.0093
66	205	13.03	20.61	31.5	sp|P0DMV9|HS71B_HUMAN	Heat shock 70 kDa protein 1B OS=Homo sapiens GN=HSPA1B PE=1 SV=1	12	4.3652	0.0135
67	90	24.04	25.62	38.5	sp|P11142|HSP7C_HUMAN	Heat shock cognate 71 kDa protein OS=Homo sapiens GN=HSPA8 PE=1 SV=1	14	4.3251	0.0023
68	497	4.17	4.19	19.9	sp|O95154|ARK73_HUMAN	Aflatoxin B1 aldehyde reductase member 3 OS=Homo sapiens GN=AKR7A3 PE=1 SV=2	2	4.3251	0.0493
69	158	15.89	15.95	28.7	sp|P14384|CBPM_HUMAN	Carboxypeptidase M OS=Homo sapiens GN=CPM PE=1 SV=2	10	4.1305	0.0003
70	418	5.74	5.87	50	sp|Q9HD89|RETN_HUMAN	Resistin OS=Homo sapiens GN=RETN PE=2 SV=1	6	4.0926	0.0477
71	109	20.88	20.9	28.6	sp|P15586|GNS_HUMAN	N-acetylglucosamine-6-sulfatase OS=Homo sapiens GN=GNS PE=1 SV=3	13	3.8019	0.008
72	243	10.79	15.4	43.4	sp|P08758|ANXA5_HUMAN	Annexin A5 OS=Homo sapiens GN=ANXA5 PE=1 SV=2	9	3.6308	0.0205
73	699	2.01	4.01	9.8	sp|Q9P2S5|WRP73_HUMAN	WD repeat-containing protein WRAP73 OS=Homo sapiens GN=WRAP73 PE=2 SV=1	2	3.5975	0.0126
74	71	27.32	28.59	42	sp|P01008|ANT3_HUMAN	Antithrombin-III OS=Homo sapiens GN=SERPINC1 PE=1 SV=1	25	3.4674	0.027
75	130	18.32	18.58	43.9	sp|P09525|ANXA4_HUMAN	Annexin A4 OS=Homo sapiens GN=ANXA4 PE=1 SV=4	10	3.342	0.0114
76	638	2.49	2.56	28.3	sp|P45877|PPIC_HUMAN	Peptidyl-prolyl cis-trans isomerase C OS=Homo sapiens GN=PPIC PE=1 SV=1	1	3.342	0.0264
77	500	4.11	36.74	63.9	sp|P01860|IGHG3_HUMAN	Ig gamma-3 chain C region OS=Homo sapiens GN=IGHG3 PE=1 SV=2	60	3.281	0.0345
78	201	13.39	16.06	32.8	sp|P36955|PEDF_HUMAN	Pigment epithelium-derived factor OS=Homo sapiens GN=SERPINF1 PE=1 SV=4	8	3.2509	0.0454
79	194	13.93	16.1	49.8	sp|Q06830|PRDX1_HUMAN	Peroxiredoxin-1 OS=Homo sapiens GN=PRDX1 PE=1 SV=1	11	3.1623	0.0047
80	366	6.55	6.57	22.3	sp|Q04760|LGUL_HUMAN	Lactoylglutathione lyase OS=Homo sapiens GN=GLO1 PE=1 SV=4	3	3.1333	0.0202
81	446	5.02	5.26	22.3	sp|P12277|KCRB_HUMAN	Creatine kinase B-type OS=Homo sapiens GN=CKB PE=1 SV=1	3	3.0761	0.008
82	373	6.42	6.57	30	sp|P02679|FIBG_HUMAN	Fibrinogen gamma chain OS=Homo sapiens GN=FGG PE=1 SV=3	6	3.0479	0.0487
83	356	6.93	7.12	10.6	sp|Q14118|DAG1_HUMAN	Dystroglycan OS=Homo sapiens GN=DAG1 PE=1 SV=2	5	3.02	0.0013
84	304	8.25	8.36	40.4	sp|P08118|MSMB_HUMAN	Beta-microseminoprotein OS=Homo sapiens GN=MSMB PE=1 SV=1	10	2.8314	0.0094
85	218	12.13	12.23	35.9	sp|P48745|NOV_HUMAN	Protein NOV homolog OS=Homo sapiens GN=NOV PE=1 SV=1	7	2.8054	0.0146
86	129	18.38	22.3	28.8	sp|P07686|HEXB_HUMAN	Beta-hexosaminidase subunit beta OS=Homo sapiens GN=HEXB PE=1 SV=3	14	2.729	0.0017
87	362	6.62	6.86	22.7	sp|P23526|SAHH_HUMAN	Adenosylhomocysteinase OS=Homo sapiens GN=AHCY PE=1 SV=4	5	2.6546	0.041
88	157	15.99	16.19	32.2	sp|P11117|PPAL_HUMAN	Lysosomal acid phosphatase OS=Homo sapiens GN=ACP2 PE=1 SV=3	10	2.5823	0.0256
89	89	24.26	27.85	37.2	sp|P16278|BGAL_HUMAN	Beta-galactosidase OS=Homo sapiens GN=GLB1 PE=1 SV=2	15	2.5119	0.0181
90	178	14.71	15.19	33	sp|P00966|ASSY_HUMAN	Argininosuccinate synthase OS=Homo sapiens GN=ASS1 PE=1 SV=2	10	2.4889	0.0322
91	195	13.89	14.1	32.6	sp|O75874|IDHC_HUMAN	Isocitrate dehydrogenase [NADP] cytoplasmic OS=Homo sapiens GN=IDH1 PE=1 SV=2	8	2.3335	0.0328
92	483	4.3	4.68	11.3	sp|P12821|ACE_HUMAN	Angiotensin-converting enzyme OS=Homo sapiens GN=ACE PE=1 SV=1	3	2.2909	0.042
93	451	4.93	5.31	28.2	sp|P08962|CD63_HUMAN	CD63 antigen OS=Homo sapiens GN=CD63 PE=1 SV=2	4	2.0893	0.004
94	641	2.45	2.48	18	sp|O75071|EFC14_HUMAN	EF-hand calcium-binding domain-containing protein 14 OS=Homo sapiens GN=EFCAB14 PE=2 SV=1	1	2.0512	0.0096
95	232	11.58	11.65	21.1	sp|Q8N6Q3|CD177_HUMAN	CD177 antigen OS=Homo sapiens GN=CD177 PE=1 SV=2	6	1.9953	0.0312
96	352	7	9.32	34	sp|P02766|TTHY_HUMAN	Transthyretin OS=Homo sapiens GN=TTR PE=1 SV=1	6	1.9055	0.0449
97	165	15.44	19.78	46.2	sp|P04075|ALDOA_HUMAN	Fructose-bisphosphate aldolase A OS=Homo sapiens GN=ALDOA PE=1 SV=2	12	1.7378	0.0313
98	659	2.19	2.22	12.4	sp|P13798|ACPH_HUMAN	Acylamino-acid-releasing enzyme OS=Homo sapiens GN=APEH PE=1 SV=4	1	1.7378	0.0201
99	300	8.38	10.75	33.6	sp|Q00796|DHSO_HUMAN	Sorbitol dehydrogenase OS=Homo sapiens GN=SORD PE=1 SV=4	7	1.7219	0.0255
100	95	23.4	23.43	98	sp|P68871|HBB_HUMAN	Hemoglobin subunit beta OS=Homo sapiens GN=HBB PE=1 SV=2	57	1.6904	0.0483
101	653	2.23	2.26	10.6	sp|O75131|CPNE3_HUMAN	Copine-3 OS=Homo sapiens GN=CPNE3 PE=1 SV=1	1	1.6293	0.0019
102	180	14.61	14.73	58.5	sp|P69905|HBA_HUMAN	Hemoglobin subunit alpha OS=Homo sapiens GN=HBA1 PE=1 SV=2	14	1.6144	0.0001
103	7	82.7	82.45	43.5	sp|P01024|CO3_HUMAN	Complement C3 OS=Homo sapiens GN=C3 PE=1 SV=2	52	1.4997	<0.00001
104	138	17.13	35.99	71.8	sp|P01857|IGHG1_HUMAN	Ig gamma-1 chain C region OS=Homo sapiens GN=IGHG1 PE=1 SV=1	115	1.3062	0.0026
105	4	97.08	95.91	70.6	sp|P02787|TRFE_HUMAN	Serotransferrin OS=Homo sapiens GN=TF PE=1 SV=3	112	1.2823	0.0006
106	1	174.91	174.91	91.8	sp|P02768|ALBU_HUMAN	Serum albumin OS=Homo sapiens GN=ALB PE=1 SV=2	528	1.2246	<0.00001
107	8	75.89	75.55	55.9	sp|P01833|PIGR_HUMAN	Polymeric immunoglobulin receptor OS=Homo sapiens GN=PIGR PE=1 SV=4	111	0.7586	<0.00001
108	23	46.94	46.97	13.2	sp|Q9Y6R7|FCGBP_HUMAN	IgGFc-binding protein OS=Homo sapiens GN=FCGBP PE=1 SV=3	26	0.7586	0.0022
109	302	8.38	8.42	73.7	sp|P07998|RNAS1_HUMAN	Ribonuclease pancreatic OS=Homo sapiens GN=RNASE1 PE=1 SV=4	72	0.7516	0.0373
110	62	28.91	31.54	24.3	sp|P12830|CADH1_HUMAN	Cadherin-1 OS=Homo sapiens GN=CDH1 PE=1 SV=3	37	0.7311	<0.00001
111	579	3.41	3.65	12.4	sp|P08236|BGLR_HUMAN	Beta-glucuronidase OS=Homo sapiens GN=GUSB PE=1 SV=2	4	0.7311	0.0325
112	237	11.29	13.43	25.1	sp|Q13477|MADCA_HUMAN	Mucosal addressin cell adhesion molecule 1 OS=Homo sapiens GN=MADCAM1 PE=1 SV=2	7	0.7178	0.0175
113	595	3.14	7.72	10.8	sp|Q14315|FLNC_HUMAN	Filamin-C OS=Homo sapiens GN=FLNC PE=1 SV=3	4	0.6855	0.0184
114	14	57.37	59.35	28.6	sp|P0C0L4|CO4A_HUMAN	Complement C4-A OS=Homo sapiens GN=C4A PE=1 SV=2	37	0.673	0.0088
115	511	4.03	6.96	12.2	sp|Q15746|MYLK_HUMAN	Myosin light chain kinase, smooth muscle OS=Homo sapiens GN=MYLK PE=1 SV=4	5	0.6427	0.0024
116	319	7.9	8.23	16.8	sp|P54760|EPHB4_HUMAN	Ephrin type-B receptor 4 OS=Homo sapiens GN=EPHB4 PE=1 SV=2	6	0.6081	0.0015
117	229	11.73	12.12	51.4	sp|P61626|LYSC_HUMAN	Lysozyme C OS=Homo sapiens GN=LYZ PE=1 SV=1	7	0.5445	0.0476
118	102	22.44	24.9	22.6	sp|Q9HCU0|CD248_HUMAN	Endosialin OS=Homo sapiens GN=CD248 PE=1 SV=1	16	0.5297	0.0182
119	439	5.26	5.34	53.2	sp|P00995|ISK1_HUMAN	Pancreatic secretory trypsin inhibitor OS=Homo sapiens GN=SPINK1 PE=1 SV=2	9	0.5012	0.0014
120	2	119.59	118.4	19.4	sp|P98164|LRP2_HUMAN	Low-density lipoprotein receptor-related protein 2 OS=Homo sapiens GN=LRP2 PE=1 SV=3	62	0.4365	0.0187
121	463	4.57	4.61	16.5	sp|P08246|ELNE_HUMAN	Neutrophil elastase OS=Homo sapiens GN=ELANE PE=1 SV=1	4	0.4246	0.0185
122	104	22.02	22.1	19.1	sp|P14543|NID1_HUMAN	Nidogen-1 OS=Homo sapiens GN=NID1 PE=1 SV=3	26	0.4093	0.0091
123	236	11.36	11.41	71.1	sp|P06702|S10A9_HUMAN	Protein S100-A9 OS=Homo sapiens GN=S100A9 PE=1 SV=1	10	0.3945	0.0077
124	181	14.55	14.93	21.8	sp|Q13421|MSLN_HUMAN	Mesothelin OS=Homo sapiens GN=MSLN PE=1 SV=2	11	0.3873	0.0165
125	5	90.77	89.11	20.2	sp|O60494|CUBN_HUMAN	Cubilin OS=Homo sapiens GN=CUBN PE=1 SV=5	54	0.3597	0.0242
126	414	5.81	7.39	51.7	sp|P11684|UTER_HUMAN	Uteroglobin OS=Homo sapiens GN=SCGB1A1 PE=1 SV=1	6	0.3532	0.0237
127	519	4.02	4.02	14.6	sp|Q14847|LASP1_HUMAN	LIM and SH3 domain protein 1 OS=Homo sapiens GN=LASP1 PE=1 SV=2	2	0.3436	0.005
128	209	12.81	12.82	69.9	sp|P05109|S10A8_HUMAN	Protein S100-A8 OS=Homo sapiens GN=S100A8 PE=1 SV=1	9	0.2965	0.0082
129	467	4.53	4.57	17.9	sp|Q8N114|SHSA5_HUMAN	Protein shisa-5 OS=Homo sapiens GN=SHISA5 PE=1 SV=1	42	0.2965	0.0008
130	279	9.27	9.43	9	sp|Q92954|PRG4_HUMAN	Proteoglycan 4 OS=Homo sapiens GN=PRG4 PE=1 SV=2	6	0.2831	0.0373
131	43	35.76	44.08	52.6	sp|P13646|K1C13_HUMAN	Keratin, type I cytoskeletal 13 OS=Homo sapiens GN=KRT13 PE=1 SV=4	31	0.278	0.0165
132	120	19.67	19.73	44.6	sp|P18065|IBP2_HUMAN	Insulin-like growth factor-binding protein 2 OS=Homo sapiens GN=IGFBP2 PE=1 SV=2	9	0.2754	0.0278
133	101	22.84	22.94	39.6	sp|P08174|DAF_HUMAN	Complement decay-accelerating factor OS=Homo sapiens GN=CD55 PE=1 SV=4	19	0.2535	0.0048
134	92	23.68	23.69	35.5	sp|Q6UX06|OLFM4_HUMAN	Olfactomedin-4 OS=Homo sapiens GN=OLFM4 PE=1 SV=1	14	0.2512	<0.00001
135	111	20.56	20.58	34.8	sp|Q9UBX5|FBLN5_HUMAN	Fibulin-5 OS=Homo sapiens GN=FBLN5 PE=1 SV=1	23	0.2249	0.0103
136	223	12.02	12.03	27.3	sp|Q14515|SPRL1_HUMAN	SPARC-like protein 1 OS=Homo sapiens GN=SPARCL1 PE=1 SV=2	8	0.2188	0.0309
137	758	2	2.04	11	sp|P22314|UBA1_HUMAN	Ubiquitin-like modifier-activating enzyme 1 OS=Homo sapiens GN=UBA1 PE=1 SV=3	1	0.2128	0.0245
138	61	29.1	29.11	39.2	sp|P05154|IPSP_HUMAN	Plasma serine protease inhibitor OS=Homo sapiens GN=SERPINA5 PE=1 SV=3	18	0.2109	0.017
139	67	27.95	28.28	65.3	sp|P04083|ANXA1_HUMAN	Annexin A1 OS=Homo sapiens GN=ANXA1 PE=1 SV=2	15	0.2089	0.0267
140	10	69.73	69.64	22.4	sp|P35555|FBN1_HUMAN	Fibrillin-1 OS=Homo sapiens GN=FBN1 PE=1 SV=3	54	0.207	0.0015
141	198	13.53	13.87	54.6	sp|P80188|NGAL_HUMAN	Neutrophil gelatinase-associated lipocalin OS=Homo sapiens GN=LCN2 PE=1 SV=2	10	0.2051	0.0021
142	372	6.43	6.47	26.4	sp|Q07507|DERM_HUMAN	Dermatopontin OS=Homo sapiens GN=DPT PE=1 SV=2	4	0.1995	0.0144
143	284	8.95	8.98	28.7	sp|P24855|DNAS1_HUMAN	Deoxyribonuclease-1 OS=Homo sapiens GN=DNASE1 PE=1 SV=1	6	0.1941	0.0195
144	55	30.57	34.06	35.4	sp|Q6EMK4|VASN_HUMAN	Vasorin OS=Homo sapiens GN=VASN PE=1 SV=1	28	0.1738	0.0061
145	440	5.23	5.34	18	sp|P49788|TIG1_HUMAN	Retinoic acid receptor responder protein 1 OS=Homo sapiens GN=RARRES1 PE=1 SV=2	3	0.1675	0.0026
146	117	20.05	20.09	38.2	sp|O94919|ENDD1_HUMAN	Endonuclease domain-containing 1 protein OS=Homo sapiens GN=ENDOD1 PE=1 SV=2	45	0.1432	0.0278
147	53	31.97	32.66	63.7	sp|P10451|OSTP_HUMAN	Osteopontin OS=Homo sapiens GN=SPP1 PE=1 SV=1	192	0.1406	0.0035
148	503	4.09	4.15	20	sp|P36896|ACV1B_HUMAN	Activin receptor type-1B OS=Homo sapiens GN=ACVR1B PE=1 SV=1	4	0.1294	0.039
149	235	11.42	11.92	20.4	sp|P0DJD8|PEPA3_HUMAN	Pepsin A-3 OS=Homo sapiens GN=PGA3 PE=1 SV=1	16	0.1138	0.0042
150	175	14.81	15.17	42.8	sp|Q8NFZ8|CADM4_HUMAN	Cell adhesion molecule 4 OS=Homo sapiens GN=CADM4 PE=1 SV=1	12	0.1117	0.0194
151	248	10.56	15.02	72.4	sp|P06314|KV404_HUMAN	Ig kappa chain V-IV region B17 OS=Homo sapiens PE=2 SV=1	44	0.1076	0.0393
152	132	18.17	18.17	26.3	sp|P23142|FBLN1_HUMAN	Fibulin-1 OS=Homo sapiens GN=FBLN1 PE=1 SV=4	15	0.1067	<0.00001
153	58	29.35	29.36	41	sp|P00734|THRB_HUMAN	Prothrombin OS=Homo sapiens GN=F2 PE=1 SV=2	111	0.1009	0.0002
154	44	35.75	35.79	57.6	sp|Q12805|FBLN3_HUMAN	EGF-containing fibulin-like extracellular matrix protein 1 OS=Homo sapiens GN=EFEMP1 PE=1 SV=2	31	0.0904	0.0324
155	186	14.32	14.35	21.6	sp|Q92692|PVRL2_HUMAN	Nectin-2 OS=Homo sapiens GN=PVRL2 PE=1 SV=1	7	0.0887	0.0433
156	187	14.25	20.28	9.4	sp|Q96RW7|HMCN1_HUMAN	Hemicentin-1 OS=Homo sapiens GN=HMCN1 PE=1 SV=2	16	0.0871	0.0034
157	133	18.14	20.62	17.7	sp|Q9ULI3|HEG1_HUMAN	Protein HEG homolog 1 OS=Homo sapiens GN=HEG1 PE=1 SV=3	11	0.0839	0.0274
158	353	6.98	8.96	43.6	sp|Q15828|CYTM_HUMAN	Cystatin-M OS=Homo sapiens GN=CST6 PE=1 SV=1	5	0.0692	0.002
159	70	27.43	27.46	74.1	sp|Q16270|IBP7_HUMAN	Insulin-like growth factor-binding protein 7 OS=Homo sapiens GN=IGFBP7 PE=1 SV=1	20	0.0655	<0.00001
160	605	2.88	3.19	23.6	sp|P09237|MMP7_HUMAN	Matrilysin OS=Homo sapiens GN=MMP7 PE=1 SV=1	3	0.0619	0.0117
161	721	2	5.73	51.9	sp|P01594|KV102_HUMAN	Ig kappa chain V-I region AU OS=Homo sapiens PE=1 SV=1	65	0.0614	0.0383
162	196	13.75	13.87	55.1	sp|B9A064|IGLL5_HUMAN	Immunoglobulin lambda-like polypeptide 5 OS=Homo sapiens GN=IGLL5 PE=2 SV=2	51	0.0511	0.0046
163	220	12.1	12.67	59.1	sp|Q9H299|SH3L3_HUMAN	SH3 domain-binding glutamic acid-rich-like protein 3 OS=Homo sapiens GN=SH3BGRL3 PE=1 SV=1	13	0.0461	0.0041
164	359	6.76	6.91	31.9	sp|P05451|REG1A_HUMAN	Lithostathine-1-alpha OS=Homo sapiens GN=REG1A PE=1 SV=3	5	0.0441	0.0097
165	819	2	2	12.7	sp|Q92876|KLK6_HUMAN	Kallikrein-6 OS=Homo sapiens GN=KLK6 PE=1 SV=1	1	0.0113	0.0252
166	732	2	4.03	13.2	sp|Q8TD90|MAGE2_HUMAN	Melanoma-associated antigen E2 OS=Homo sapiens GN=MAGEE2 PE=2 SV=1	2	0.0111	0.028
167	548	4	4	27.6	sp|O43653|PSCA_HUMAN	Prostate stem cell antigen OS=Homo sapiens GN=PSCA PE=1 SV=1	3	0.0101	0.0278

## Sheet: AKI-24h VS.CON-24h
Table SIB. Differentially expressed proteins in the AKI-24h/CON-24h comparison.
No.	N	Unused	Total	% Cov	Accession #	Name	Peptides(95%)	AKI-24h/AKI-Pre	P-Value
1	123	19.3	19.38	59	sp|P07288|KLK3_HUMAN	Prostate-specific antigen OS=Homo sapiens GN=KLK3 PE=1 SV=2	24	65.4636	0.0177
2	124	19.23	19.26	34.7	sp|P15309|PPAP_HUMAN	Prostatic acid phosphatase OS=Homo sapiens GN=ACPP PE=1 SV=3	13	64.2688	0.0026
3	137	17.42	17.5	58.1	sp|P32119|PRDX2_HUMAN	Peroxiredoxin-2 OS=Homo sapiens GN=PRDX2 PE=1 SV=5	11	57.0164	<0.00001
4	107	20.93	20.92	55.2	sp|P00915|CAH1_HUMAN	Carbonic anhydrase 1 OS=Homo sapiens GN=CA1 PE=1 SV=2	38	52.9663	<0.00001
5	50	33.07	33.16	55.2	sp|P04279|SEMG1_HUMAN	Semenogelin-1 OS=Homo sapiens GN=SEMG1 PE=1 SV=2	28	41.6869	0.0004
6	33	39.05	38.69	69.2	sp|P00738|HPT_HUMAN	Haptoglobin OS=Homo sapiens GN=HP PE=1 SV=1	34	34.3558	0.0001
7	25	43.38	48.55	59.7	sp|P02788|TRFL_HUMAN	Lactotransferrin OS=Homo sapiens GN=LTF PE=1 SV=6	37	26.7917	<0.00001
8	255	10.24	21.23	98	sp|P02042|HBD_HUMAN	Hemoglobin subunit delta OS=Homo sapiens GN=HBD PE=1 SV=2	42	25.5859	0.0002
9	460	4.67	4.78	21.2	sp|Q96S96|PEBP4_HUMAN	Phosphatidylethanolamine-binding protein 4 OS=Homo sapiens GN=PEBP4 PE=1 SV=3	2	25.1189	0.0046
10	32	39.69	40.14	24.7	sp|P01023|A2MG_HUMAN	Alpha-2-macroglobulin OS=Homo sapiens GN=A2M PE=1 SV=3	18	22.9087	<0.00001
11	148	16.29	16.45	36.4	sp|P04040|CATA_HUMAN	Catalase OS=Homo sapiens GN=CAT PE=1 SV=3	9	22.4905	0.0208
12	159	15.85	15.99	26.9	sp|P16870|CBPE_HUMAN	Carboxypeptidase E OS=Homo sapiens GN=CPE PE=1 SV=1	9	21.0863	<0.00001
13	389	6.04	6.05	22.7	sp|P01033|TIMP1_HUMAN	Metalloproteinase inhibitor 1 OS=Homo sapiens GN=TIMP1 PE=1 SV=1	3	18.197	0.017
14	446	5.02	5.26	22.3	sp|P12277|KCRB_HUMAN	Creatine kinase B-type OS=Homo sapiens GN=CKB PE=1 SV=1	3	15.1356	0.001
15	243	10.79	15.4	43.4	sp|P08758|ANXA5_HUMAN	Annexin A5 OS=Homo sapiens GN=ANXA5 PE=1 SV=2	9	14.0605	0.0005
16	300	8.38	10.75	33.6	sp|Q00796|DHSO_HUMAN	Sorbitol dehydrogenase OS=Homo sapiens GN=SORD PE=1 SV=4	7	13.1826	0.0015
17	24	44.51	54.24	54.5	sp|P35908|K22E_HUMAN	Keratin, type II cytoskeletal 2 epidermal OS=Homo sapiens GN=KRT2 PE=1 SV=2	42	13.0617	0.0005
18	273	9.51	9.57	30.2	sp|Q99574|NEUS_HUMAN	Neuroserpin OS=Homo sapiens GN=SERPINI1 PE=1 SV=1	7	12.1339	0.0075
19	135	17.66	20.09	33.7	sp|Q5T2W1|NHRF3_HUMAN	Na(+)/H(+) exchange regulatory cofactor NHE-RF3 OS=Homo sapiens GN=PDZK1 PE=1 SV=2	9	11.695	0.0224
20	72	27.28	27.59	66.7	sp|P02647|APOA1_HUMAN	Apolipoprotein A-I OS=Homo sapiens GN=APOA1 PE=1 SV=1	21	10.8643	<0.00001
21	92	23.68	23.69	35.5	sp|Q6UX06|OLFM4_HUMAN	Olfactomedin-4 OS=Homo sapiens GN=OLFM4 PE=1 SV=1	14	10.7647	0.0002
22	638	2.49	2.56	28.3	sp|P45877|PPIC_HUMAN	Peptidyl-prolyl cis-trans isomerase C OS=Homo sapiens GN=PPIC PE=1 SV=1	1	9.6383	0.0041
23	126	18.97	18.94	30.3	sp|P19320|VCAM1_HUMAN	Vascular cell adhesion protein 1 OS=Homo sapiens GN=VCAM1 PE=1 SV=1	11	9.4624	0.0004
24	221	12.07	12.15	39.7	sp|P30041|PRDX6_HUMAN	Peroxiredoxin-6 OS=Homo sapiens GN=PRDX6 PE=1 SV=3	8	8.9536	0.0018
25	97	23.1	23.23	15.9	sp|Q9BXP8|PAPP2_HUMAN	Pappalysin-2 OS=Homo sapiens GN=PAPPA2 PE=1 SV=4	13	8.8716	0.0014
26	202	13.28	13.57	47.1	sp|P08294|SODE_HUMAN	Extracellular superoxide dismutase [Cu-Zn] OS=Homo sapiens GN=SOD3 PE=1 SV=2	10	8.7902	0.0236
27	268	9.78	9.9	29.2	sp|P00918|CAH2_HUMAN	Carbonic anhydrase 2 OS=Homo sapiens GN=CA2 PE=1 SV=2	6	8.7096	0.0001
28	414	5.81	7.39	51.7	sp|P11684|UTER_HUMAN	Uteroglobin OS=Homo sapiens GN=SCGB1A1 PE=1 SV=1	6	8.5507	0.0106
29	483	4.3	4.68	11.3	sp|P12821|ACE_HUMAN	Angiotensin-converting enzyme OS=Homo sapiens GN=ACE PE=1 SV=1	3	8.2414	0.0105
30	501	4.11	4.12	8	sp|P20142|PEPC_HUMAN	Gastricsin OS=Homo sapiens GN=PGC PE=1 SV=1	2	7.5858	0.0017
31	195	13.89	14.1	32.6	sp|O75874|IDHC_HUMAN	Isocitrate dehydrogenase [NADP] cytoplasmic OS=Homo sapiens GN=IDH1 PE=1 SV=2	8	6.9183	<0.00001
32	252	10.37	13.66	50.3	sp|Q99497|PARK7_HUMAN	Protein deglycase DJ-1 OS=Homo sapiens GN=PARK7 PE=1 SV=2	7	5.9704	<0.00001
33	149	16.23	16.35	66.9	sp|P00441|SODC_HUMAN	Superoxide dismutase [Cu-Zn] OS=Homo sapiens GN=SOD1 PE=1 SV=2	11	5.7016	<0.00001
34	451	4.93	5.31	28.2	sp|P08962|CD63_HUMAN	CD63 antigen OS=Homo sapiens GN=CD63 PE=1 SV=2	4	5.7016	0.0001
35	21	47.85	47.69	51.9	sp|P13645|K1C10_HUMAN	Keratin, type I cytoskeletal 10 OS=Homo sapiens GN=KRT10 PE=1 SV=6	55	5.3951	0.0023
36	59	29.19	29.23	34.8	sp|P19440|GGT1_HUMAN	Gamma-glutamyltranspeptidase 1 OS=Homo sapiens GN=GGT1 PE=1 SV=2	20	5.0582	<0.00001
37	23	46.94	46.97	13.2	sp|Q9Y6R7|FCGBP_HUMAN	IgGFc-binding protein OS=Homo sapiens GN=FCGBP PE=1 SV=3	26	4.9659	<0.00001
38	143	16.81	17.03	35	sp|P14618|KPYM_HUMAN	Pyruvate kinase PKM OS=Homo sapiens GN=PKM PE=1 SV=4	12	4.9659	0.0007
39	350	7.03	7.24	51.8	sp|P81605|DCD_HUMAN	Dermcidin OS=Homo sapiens GN=DCD PE=1 SV=2	5	4.9204	0.0245
40	317	7.92	8.04	42.4	sp|P30046|DOPD_HUMAN	D-dopachrome decarboxylase OS=Homo sapiens GN=DDT PE=1 SV=3	4	4.5709	0.039
41	181	14.55	14.93	21.8	sp|Q13421|MSLN_HUMAN	Mesothelin OS=Homo sapiens GN=MSLN PE=1 SV=2	11	4.4875	0.0442
42	366	6.55	6.57	22.3	sp|Q04760|LGUL_HUMAN	Lactoylglutathione lyase OS=Homo sapiens GN=GLO1 PE=1 SV=4	3	4.4463	0.0131
43	170	15.21	16.01	29.3	sp|P22891|PROZ_HUMAN	Vitamin K-dependent protein Z OS=Homo sapiens GN=PROZ PE=1 SV=2	8	4.1305	0.0247
44	200	13.42	25.31	37.8	sp|P26038|MOES_HUMAN	Moesin OS=Homo sapiens GN=MSN PE=1 SV=3	14	3.9084	0.0207
45	116	20.06	20.15	47.2	sp|O14745|NHRF1_HUMAN	Na(+)/H(+) exchange regulatory cofactor NHE-RF1 OS=Homo sapiens GN=SLC9A3R1 PE=1 SV=4	12	3.8726	0.0207
46	158	15.89	15.95	28.7	sp|P14384|CBPM_HUMAN	Carboxypeptidase M OS=Homo sapiens GN=CPM PE=1 SV=2	10	3.8371	0.005
47	204	13.18	13.28	29.5	sp|P13796|PLSL_HUMAN	Plastin-2 OS=Homo sapiens GN=LCP1 PE=1 SV=6	8	3.5645	0.0104
48	20	50.69	52.04	23.1	sp|O43451|MGA_HUMAN	Maltase-glucoamylase, intestinal OS=Homo sapiens GN=MGAM PE=1 SV=5	30	3.5318	<0.00001
49	47	34.28	34.29	61.4	sp|P06727|APOA4_HUMAN	Apolipoprotein A-IV OS=Homo sapiens GN=APOA4 PE=1 SV=3	20	3.2211	<0.00001
50	165	15.44	19.78	46.2	sp|P04075|ALDOA_HUMAN	Fructose-bisphosphate aldolase A OS=Homo sapiens GN=ALDOA PE=1 SV=2	12	2.9923	0.0004
51	218	12.13	12.23	35.9	sp|P48745|NOV_HUMAN	Protein NOV homolog OS=Homo sapiens GN=NOV PE=1 SV=1	7	2.9376	0.0049
52	194	13.93	16.1	49.8	sp|Q06830|PRDX1_HUMAN	Peroxiredoxin-1 OS=Homo sapiens GN=PRDX1 PE=1 SV=1	11	2.9107	0.0114
53	438	5.26	5.41	26.7	sp|P40925|MDHC_HUMAN	Malate dehydrogenase, cytoplasmic OS=Homo sapiens GN=MDH1 PE=1 SV=4	3	2.7542	0.0352
54	127	18.69	18.71	46.9	sp|P63104|1433Z_HUMAN	14-3-3 protein zeta/delta OS=Homo sapiens GN=YWHAZ PE=1 SV=1	12	2.704	0.0273
55	261	10.09	10.21	24	sp|Q96KP4|CNDP2_HUMAN	Cytosolic non-specific dipeptidase OS=Homo sapiens GN=CNDP2 PE=1 SV=2	7	2.6303	0.0191
56	293	8.66	9.11	30.9	sp|P11279|LAMP1_HUMAN	Lysosome-associated membrane glycoprotein 1 OS=Homo sapiens GN=LAMP1 PE=1 SV=3	10	2.6062	0.012
57	343	7.3	9.51	23.8	sp|P07900|HS90A_HUMAN	Heat shock protein HSP 90-alpha OS=Homo sapiens GN=HSP90AA1 PE=1 SV=5	5	2.466	0.0412
58	19	51.84	52.17	17.9	sp|P02751|FINC_HUMAN	Fibronectin OS=Homo sapiens GN=FN1 PE=1 SV=4	29	2.3988	0.0003
59	90	24.04	25.62	38.5	sp|P11142|HSP7C_HUMAN	Heat shock cognate 71 kDa protein OS=Homo sapiens GN=HSPA8 PE=1 SV=1	14	2.3988	0.0087
60	28	41.06	43.13	32.6	sp|P27487|DPP4_HUMAN	Dipeptidyl peptidase 4 OS=Homo sapiens GN=DPP4 PE=1 SV=2	21	2.3335	<0.00001
61	93	23.63	23.65	44.5	sp|P04406|G3P_HUMAN	Glyceraldehyde-3-phosphate dehydrogenase OS=Homo sapiens GN=GAPDH PE=1 SV=3	20	2.2699	0.0013
62	74	26.87	28.3	28.9	sp|P08473|NEP_HUMAN	Neprilysin OS=Homo sapiens GN=MME PE=1 SV=2	19	2.2284	0.005
63	232	11.58	11.65	21.1	sp|Q8N6Q3|CD177_HUMAN	CD177 antigen OS=Homo sapiens GN=CD177 PE=1 SV=2	6	2.1878	0.0099
64	91	23.88	25.75	59.4	sp|P60174|TPIS_HUMAN	Triosephosphate isomerase OS=Homo sapiens GN=TPI1 PE=1 SV=3	14	2.0893	0.0061
65	167	15.29	15.44	29.2	sp|Q8WUM4|PDC6I_HUMAN	Programmed cell death 6-interacting protein OS=Homo sapiens GN=PDCD6IP PE=1 SV=1	9	2.0701	0.011
66	452	4.89	4.98	12.7	sp|P19801|AOC1_HUMAN	Amiloride-sensitive amine oxidase [copper-containing] OS=Homo sapiens GN=AOC1 PE=1 SV=4	2	2.0701	0.0208
67	87	24.47	25.28	48.7	sp|P00558|PGK1_HUMAN	Phosphoglycerate kinase 1 OS=Homo sapiens GN=PGK1 PE=1 SV=3	14	2.0324	0.0035
68	526	4	18.49	42.4	sp|P01877|IGHA2_HUMAN	Ig alpha-2 chain C region OS=Homo sapiens GN=IGHA2 PE=1 SV=3	58	1.977	0.0015
69	659	2.19	2.22	12.4	sp|P13798|ACPH_HUMAN	Acylamino-acid-releasing enzyme OS=Homo sapiens GN=APEH PE=1 SV=4	1	1.7061	0.0384
70	95	23.4	23.43	98	sp|P68871|HBB_HUMAN	Hemoglobin subunit beta OS=Homo sapiens GN=HBB PE=1 SV=2	57	1.6749	0.0001
71	180	14.61	14.73	58.5	sp|P69905|HBA_HUMAN	Hemoglobin subunit alpha OS=Homo sapiens GN=HBA1 PE=1 SV=2	14	1.5996	0.0032
72	475	4.42	16.61	23.8	sp|P35241|RADI_HUMAN	Radixin OS=Homo sapiens GN=RDX PE=1 SV=1	9	1.5704	0.0454
73	695	2.02	2.02	18.5	sp|P01903|DRA_HUMAN	HLA class II histocompatibility antigen, DR alpha chain OS=Homo sapiens GN=HLA-DRA PE=1 SV=1	1	1.406	0.0279
74	7	82.7	82.45	43.5	sp|P01024|CO3_HUMAN	Complement C3 OS=Homo sapiens GN=C3 PE=1 SV=2	52	1.3804	<0.00001
75	129	18.38	22.3	28.8	sp|P07686|HEXB_HUMAN	Beta-hexosaminidase subunit beta OS=Homo sapiens GN=HEXB PE=1 SV=3	14	1.3804	0.0345
76	698	2.01	4.05	7.1	sp|P04275|VWF_HUMAN	von Willebrand factor OS=Homo sapiens GN=VWF PE=1 SV=4	2	1.3804	0.0453
77	17	52.6	52.4	73.2	sp|P25311|ZA2G_HUMAN	Zinc-alpha-2-glycoprotein OS=Homo sapiens GN=AZGP1 PE=1 SV=2	88	1.2246	<0.00001
78	69	27.51	27.57	47.5	sp|P08571|CD14_HUMAN	Monocyte differentiation antigen CD14 OS=Homo sapiens GN=CD14 PE=1 SV=2	25	0.8241	<0.00001
79	163	15.56	16.42	37	sp|Q93088|BHMT1_HUMAN	Betaine--homocysteine S-methyltransferase 1 OS=Homo sapiens GN=BHMT PE=1 SV=2	11	0.8166	0.0189
80	302	8.38	8.42	73.7	sp|P07998|RNAS1_HUMAN	Ribonuclease pancreatic OS=Homo sapiens GN=RNASE1 PE=1 SV=4	72	0.8166	0.0205
81	62	28.91	31.54	24.3	sp|P12830|CADH1_HUMAN	Cadherin-1 OS=Homo sapiens GN=CDH1 PE=1 SV=3	37	0.8091	<0.00001
82	99	22.93	23.03	36.3	sp|P02750|A2GL_HUMAN	Leucine-rich alpha-2-glycoprotein OS=Homo sapiens GN=LRG1 PE=1 SV=2	32	0.8017	<0.00001
83	11	65.87	66.02	41.5	sp|P01133|EGF_HUMAN	Pro-epidermal growth factor OS=Homo sapiens GN=EGF PE=1 SV=2	45	0.7943	<0.00001
84	527	4	12.56	70.4	sp|P01614|KV201_HUMAN	Ig kappa chain V-II region Cum OS=Homo sapiens PE=1 SV=1	57	0.7727	0.0255
85	511	4.03	6.96	12.2	sp|Q15746|MYLK_HUMAN	Myosin light chain kinase, smooth muscle OS=Homo sapiens GN=MYLK PE=1 SV=4	5	0.7516	0.0262
86	413	5.81	8.17	14.3	sp|Q16849|PTPRN_HUMAN	Receptor-type tyrosine-protein phosphatase-like N OS=Homo sapiens GN=PTPRN PE=1 SV=1	9	0.7047	0.0373
87	16	53.81	53.58	72.7	sp|P01009|A1AT_HUMAN	Alpha-1-antitrypsin OS=Homo sapiens GN=SERPINA1 PE=1 SV=3	86	0.6546	0.0015
88	42	35.82	36.52	27.6	sp|P10253|LYAG_HUMAN	Lysosomal alpha-glucosidase OS=Homo sapiens GN=GAA PE=1 SV=4	34	0.6026	0.0049
89	71	27.32	28.59	42	sp|P01008|ANT3_HUMAN	Antithrombin-III OS=Homo sapiens GN=SERPINC1 PE=1 SV=1	25	0.6026	0.0173
90	417	5.75	5.93	28.7	sp|Q99519|NEUR1_HUMAN	Sialidase-1 OS=Homo sapiens GN=NEU1 PE=1 SV=1	3	0.597	0.0487
91	128	18.49	19.72	29	sp|P15289|ARSA_HUMAN	Arylsulfatase A OS=Homo sapiens GN=ARSA PE=1 SV=3	15	0.5754	0.0191
92	78	26.08	28.48	29.2	sp|P54802|ANAG_HUMAN	Alpha-N-acetylglucosaminidase OS=Homo sapiens GN=NAGLU PE=1 SV=2	20	0.5546	0.0148
93	96	23.29	23.33	97	sp|Q9UBC9|SPRR3_HUMAN	Small proline-rich protein 3 OS=Homo sapiens GN=SPRR3 PE=1 SV=2	28	0.5495	<0.00001
94	229	11.73	12.12	51.4	sp|P61626|LYSC_HUMAN	Lysozyme C OS=Homo sapiens GN=LYZ PE=1 SV=1	7	0.5346	0.0338
95	89	24.26	27.85	37.2	sp|P16278|BGAL_HUMAN	Beta-galactosidase OS=Homo sapiens GN=GLB1 PE=1 SV=2	15	0.52	0.0008
96	182	14.54	14.74	38.5	sp|P02649|APOE_HUMAN	Apolipoprotein E OS=Homo sapiens GN=APOE PE=1 SV=1	10	0.5105	0.0019
97	104	22.02	22.1	19.1	sp|P14543|NID1_HUMAN	Nidogen-1 OS=Homo sapiens GN=NID1 PE=1 SV=3	26	0.5058	0.0196
98	208	12.84	12.87	40.3	sp|Q92820|GGH_HUMAN	Gamma-glutamyl hydrolase OS=Homo sapiens GN=GGH PE=1 SV=2	9	0.492	0.0036
99	152	16.2	18.22	24.4	sp|P50895|BCAM_HUMAN	Basal cell adhesion molecule OS=Homo sapiens GN=BCAM PE=1 SV=2	9	0.4875	0.0183
100	166	15.29	17.48	29.7	sp|P08195|4F2_HUMAN	4F2 cell-surface antigen heavy chain OS=Homo sapiens GN=SLC3A2 PE=1 SV=3	11	0.4742	0.025
101	289	8.78	8.87	27.2	sp|P09668|CATH_HUMAN	Pro-cathepsin H OS=Homo sapiens GN=CTSH PE=1 SV=4	5	0.4699	0.0371
102	160	15.83	18.38	21.3	sp|P10619|PPGB_HUMAN	Lysosomal protective protein OS=Homo sapiens GN=CTSA PE=1 SV=2	11	0.4571	0.0052
103	264	10.02	13.48	21	sp|O00187|MASP2_HUMAN	Mannan-binding lectin serine protease 2 OS=Homo sapiens GN=MASP2 PE=1 SV=4	16	0.4446	0.0165
104	409	5.92	6.16	8.3	sp|Q08174|PCDH1_HUMAN	Protocadherin-1 OS=Homo sapiens GN=PCDH1 PE=1 SV=2	4	0.4285	0.0081
105	109	20.88	20.9	28.6	sp|P15586|GNS_HUMAN	N-acetylglucosamine-6-sulfatase OS=Homo sapiens GN=GNS PE=1 SV=3	13	0.4246	0.0002
106	199	13.49	15.61	26	sp|Q96PD5|PGRP2_HUMAN	N-acetylmuramoyl-L-alanine amidase OS=Homo sapiens GN=PGLYRP2 PE=1 SV=1	10	0.3945	0.0254
107	30	40.59	41.41	44.7	sp|P00747|PLMN_HUMAN	Plasminogen OS=Homo sapiens GN=PLG PE=1 SV=2	28	0.3908	0.0047
108	114	20.44	20.48	42.6	sp|Q01459|DIAC_HUMAN	Di-N-acetylchitobiase OS=Homo sapiens GN=CTBS PE=1 SV=1	12	0.3908	0.0005
109	228	11.75	11.84	25.2	sp|P08185|CBG_HUMAN	Corticosteroid-binding globulin OS=Homo sapiens GN=SERPINA6 PE=1 SV=1	7	0.3873	0.0081
110	155	16.04	16.02	42	sp|P04792|HSPB1_HUMAN	Heat shock protein beta-1 OS=Homo sapiens GN=HSPB1 PE=1 SV=2	8	0.3837	0.0291
111	40	36.17	46.49	51	sp|P13647|K2C5_HUMAN	Keratin, type II cytoskeletal 5 OS=Homo sapiens GN=KRT5 PE=1 SV=3	29	0.3802	0.0016
112	279	9.27	9.43	9	sp|Q92954|PRG4_HUMAN	Proteoglycan 4 OS=Homo sapiens GN=PRG4 PE=1 SV=2	6	0.3631	0.021
113	189	14.2	16.9	26.5	sp|Q9Y646|CBPQ_HUMAN	Carboxypeptidase Q OS=Homo sapiens GN=CPQ PE=1 SV=1	8	0.3565	0.0007
114	14	57.37	59.35	28.6	sp|P0C0L4|CO4A_HUMAN	Complement C4-A OS=Homo sapiens GN=C4A PE=1 SV=2	37	0.3467	0.0017
115	27	41.16	42.12	51.8	sp|P01011|AACT_HUMAN	Alpha-1-antichymotrypsin OS=Homo sapiens GN=SERPINA3 PE=1 SV=2	60	0.3436	<0.00001
116	249	10.5	11.34	21.7	sp|Q9UIV8|SPB13_HUMAN	Serpin B13 OS=Homo sapiens GN=SERPINB13 PE=1 SV=2	5	0.3373	0.0045
117	222	12.06	12.45	52.4	sp|Q92520|FAM3C_HUMAN	Protein FAM3C OS=Homo sapiens GN=FAM3C PE=1 SV=1	8	0.3251	0.0293
118	83	25.16	26.5	32.5	sp|P04217|A1BG_HUMAN	Alpha-1B-glycoprotein OS=Homo sapiens GN=A1BG PE=1 SV=4	19	0.3192	0.0002
119	36	36.79	40.2	34.1	sp|P12109|CO6A1_HUMAN	Collagen alpha-1(VI) chain OS=Homo sapiens GN=COL6A1 PE=1 SV=3	38	0.3162	0.0007
120	190	14.07	14.22	22.5	sp|P55287|CAD11_HUMAN	Cadherin-11 OS=Homo sapiens GN=CDH11 PE=2 SV=2	8	0.3105	0.0004
121	285	8.93	9.07	29.8	sp|P07858|CATB_HUMAN	Cathepsin B OS=Homo sapiens GN=CTSB PE=1 SV=3	7	0.3105	0.0135
122	234	11.46	11.54	32	sp|P53634|CATC_HUMAN	Dipeptidyl peptidase 1 OS=Homo sapiens GN=CTSC PE=1 SV=2	7	0.3076	0.0021
123	306	8.21	9.33	34.7	sp|P67936|TPM4_HUMAN	Tropomyosin alpha-4 chain OS=Homo sapiens GN=TPM4 PE=1 SV=3	5	0.3076	0.0048
124	351	7.01	7.69	10.2	sp|Q9Y2E5|MA2B2_HUMAN	Epididymis-specific alpha-mannosidase OS=Homo sapiens GN=MAN2B2 PE=1 SV=4	5	0.3048	0.0141
125	500	4.11	36.74	63.9	sp|P01860|IGHG3_HUMAN	Ig gamma-3 chain C region OS=Homo sapiens GN=IGHG3 PE=1 SV=2	60	0.2992	0.0195
126	329	7.67	8.06	26.6	sp|P18510|IL1RA_HUMAN	Interleukin-1 receptor antagonist protein OS=Homo sapiens GN=IL1RN PE=1 SV=1	5	0.2729	0.0147
127	467	4.53	4.57	17.9	sp|Q8N114|SHSA5_HUMAN	Protein shisa-5 OS=Homo sapiens GN=SHISA5 PE=1 SV=1	42	0.2704	0.0003
128	272	9.52	9.55	38	sp|Q03403|TFF2_HUMAN	Trefoil factor 2 OS=Homo sapiens GN=TFF2 PE=1 SV=2	11	0.2655	0.0242
129	63	28.89	28.93	47.5	sp|Q12907|LMAN2_HUMAN	Vesicular integral-membrane protein VIP36 OS=Homo sapiens GN=LMAN2 PE=1 SV=1	26	0.2466	0.0004
130	169	15.24	15.21	30.8	sp|P51884|LUM_HUMAN	Lumican OS=Homo sapiens GN=LUM PE=1 SV=2	9	0.2421	0.0231
131	813	2	2	21.1	sp|P02511|CRYAB_HUMAN	Alpha-crystallin B chain OS=Homo sapiens GN=CRYAB PE=1 SV=2	1	0.2333	0.0293
132	198	13.53	13.87	54.6	sp|P80188|NGAL_HUMAN	Neutrophil gelatinase-associated lipocalin OS=Homo sapiens GN=LCN2 PE=1 SV=2	10	0.2208	0.0026
133	235	11.42	11.92	20.4	sp|P0DJD8|PEPA3_HUMAN	Pepsin A-3 OS=Homo sapiens GN=PGA3 PE=1 SV=1	16	0.2208	0.0017
134	106	21.12	21.15	36.4	sp|P05543|THBG_HUMAN	Thyroxine-binding globulin OS=Homo sapiens GN=SERPINA7 PE=1 SV=2	18	0.2188	0.0028
135	231	11.66	11.75	37	sp|P15328|FOLR1_HUMAN	Folate receptor alpha OS=Homo sapiens GN=FOLR1 PE=1 SV=3	10	0.2188	0.028
136	86	24.6	24.78	20.4	sp|A8K2U0|A2ML1_HUMAN	Alpha-2-macroglobulin-like protein 1 OS=Homo sapiens GN=A2ML1 PE=1 SV=3	14	0.2168	<0.00001
137	426	5.47	5.56	72.2	sp|P35326|SPR2A_HUMAN	Small proline-rich protein 2A OS=Homo sapiens GN=SPRR2A PE=1 SV=1	5	0.2148	0.04
138	242	10.84	13.04	34.8	sp|P21810|PGS1_HUMAN	Biglycan OS=Homo sapiens GN=BGN PE=1 SV=2	15	0.1995	0.0347
139	330	7.59	30.29	49.5	sp|P08779|K1C16_HUMAN	Keratin, type I cytoskeletal 16 OS=Homo sapiens GN=KRT16 PE=1 SV=4	18	0.1995	0.0348
140	177	14.71	16.82	28.5	sp|Q6UXB8|PI16_HUMAN	Peptidase inhibitor 16 OS=Homo sapiens GN=PI16 PE=1 SV=1	18	0.182	0.008
141	301	8.38	8.62	25.7	sp|O95274|LYPD3_HUMAN	Ly6/PLAUR domain-containing protein 3 OS=Homo sapiens GN=LYPD3 PE=1 SV=2	6	0.182	0.0012
142	374	6.4	6.5	75.5	sp|P01040|CYTA_HUMAN	Cystatin-A OS=Homo sapiens GN=CSTA PE=1 SV=1	6	0.177	0.0025
143	53	31.97	32.66	63.7	sp|P10451|OSTP_HUMAN	Osteopontin OS=Homo sapiens GN=SPP1 PE=1 SV=1	192	0.1738	0.0018
144	146	16.67	16.7	46.4	sp|O75594|PGRP1_HUMAN	Peptidoglycan recognition protein 1 OS=Homo sapiens GN=PGLYRP1 PE=1 SV=1	25	0.1722	0.0496
145	134	17.9	18.06	25.5	sp|P55290|CAD13_HUMAN	Cadherin-13 OS=Homo sapiens GN=CDH13 PE=1 SV=1	14	0.1706	0.0126
146	209	12.81	12.82	69.9	sp|P05109|S10A8_HUMAN	Protein S100-A8 OS=Homo sapiens GN=S100A8 PE=1 SV=1	9	0.1644	<0.00001
147	10	69.73	69.64	22.4	sp|P35555|FBN1_HUMAN	Fibrillin-1 OS=Homo sapiens GN=FBN1 PE=1 SV=3	54	0.1585	0.0006
148	331	7.54	8.07	12.8	sp|P39059|COFA1_HUMAN	Collagen alpha-1(XV) chain OS=Homo sapiens GN=COL15A1 PE=1 SV=2	5	0.1556	0.0415
149	641	2.45	2.48	18	sp|O75071|EFC14_HUMAN	EF-hand calcium-binding domain-containing protein 14 OS=Homo sapiens GN=EFCAB14 PE=2 SV=1	1	0.1556	0.0016
150	2	119.59	118.4	19.4	sp|P98164|LRP2_HUMAN	Low-density lipoprotein receptor-related protein 2 OS=Homo sapiens GN=LRP2 PE=1 SV=3	62	0.1459	<0.00001
151	119	19.7	19.8	47.1	sp|P02765|FETUA_HUMAN	Alpha-2-HS-glycoprotein OS=Homo sapiens GN=AHSG PE=1 SV=1	58	0.1432	0.0002
152	254	10.36	11.99	23.2	sp|Q9NQ38|ISK5_HUMAN	Serine protease inhibitor Kazal-type 5 OS=Homo sapiens GN=SPINK5 PE=1 SV=2	7	0.1406	0.0034
153	284	8.95	8.98	28.7	sp|P24855|DNAS1_HUMAN	Deoxyribonuclease-1 OS=Homo sapiens GN=DNASE1 PE=1 SV=1	6	0.138	0.0328
154	121	19.47	19.69	20	sp|Q02487|DSC2_HUMAN	Desmocollin-2 OS=Homo sapiens GN=DSC2 PE=1 SV=1	13	0.118	0.0326
155	84	25.12	49.02	52.7	sp|P02538|K2C6A_HUMAN	Keratin, type II cytoskeletal 6A OS=Homo sapiens GN=KRT6A PE=1 SV=3	28	0.1127	0.0371
156	296	8.57	8.72	27.3	sp|P33908|MA1A1_HUMAN	Mannosyl-oligosaccharide 1,2-alpha-mannosidase IA OS=Homo sapiens GN=MAN1A1 PE=1 SV=3	4	0.1096	0.004
157	5	90.77	89.11	20.2	sp|O60494|CUBN_HUMAN	Cubilin OS=Homo sapiens GN=CUBN PE=1 SV=5	54	0.1067	<0.00001
158	55	30.57	34.06	35.4	sp|Q6EMK4|VASN_HUMAN	Vasorin OS=Homo sapiens GN=VASN PE=1 SV=1	28	0.0982	0.0001
159	191	14.02	14.04	21	sp|Q969P0|IGSF8_HUMAN	Immunoglobulin superfamily member 8 OS=Homo sapiens GN=IGSF8 PE=1 SV=1	12	0.0973	0.0134
160	70	27.43	27.46	74.1	sp|Q16270|IBP7_HUMAN	Insulin-like growth factor-binding protein 7 OS=Homo sapiens GN=IGFBP7 PE=1 SV=1	20	0.0824	0.0001
161	112	20.52	28.5	47.6	sp|P19013|K2C4_HUMAN	Keratin, type II cytoskeletal 4 OS=Homo sapiens GN=KRT4 PE=1 SV=4	18	0.0817	<0.00001
162	605	2.88	3.19	23.6	sp|P09237|MMP7_HUMAN	Matrilysin OS=Homo sapiens GN=MMP7 PE=1 SV=1	3	0.0817	0.0387
163	85	25.11	25.69	42.9	sp|P04004|VTNC_HUMAN	Vitronectin OS=Homo sapiens GN=VTN PE=1 SV=1	16	0.0809	0.0026
164	248	10.56	15.02	72.4	sp|P06314|KV404_HUMAN	Ig kappa chain V-IV region B17 OS=Homo sapiens PE=2 SV=1	44	0.0809	0.0339
165	22	47.12	48.78	43	sp|P06396|GELS_HUMAN	Gelsolin OS=Homo sapiens GN=GSN PE=1 SV=1	89	0.0718	<0.00001
166	61	29.1	29.11	39.2	sp|P05154|IPSP_HUMAN	Plasma serine protease inhibitor OS=Homo sapiens GN=SERPINA5 PE=1 SV=3	18	0.0698	<0.00001
167	120	19.67	19.73	44.6	sp|P18065|IBP2_HUMAN	Insulin-like growth factor-binding protein 2 OS=Homo sapiens GN=IGFBP2 PE=1 SV=2	9	0.0698	0.0004
168	179	14.64	15.3	23.8	sp|P42785|PCP_HUMAN	Lysosomal Pro-X carboxypeptidase OS=Homo sapiens GN=PRCP PE=1 SV=1	8	0.0685	0.0052
169	108	20.88	23.4	35.3	sp|Q09666|AHNK_HUMAN	Neuroblast differentiation-associated protein AHNAK OS=Homo sapiens GN=AHNAK PE=1 SV=2	16	0.0643	0.0112
170	721	2	5.73	51.9	sp|P01594|KV102_HUMAN	Ig kappa chain V-I region AU OS=Homo sapiens PE=1 SV=1	65	0.0643	0.0227
171	236	11.36	11.41	71.1	sp|P06702|S10A9_HUMAN	Protein S100-A9 OS=Homo sapiens GN=S100A9 PE=1 SV=1	10	0.0619	<0.00001
172	353	6.98	8.96	43.6	sp|Q15828|CYTM_HUMAN	Cystatin-M OS=Homo sapiens GN=CST6 PE=1 SV=1	5	0.0614	0.0007
173	196	13.75	13.87	55.1	sp|B9A064|IGLL5_HUMAN	Immunoglobulin lambda-like polypeptide 5 OS=Homo sapiens GN=IGLL5 PE=2 SV=2	51	0.0603	0.0018
174	337	7.42	7.56	93.3	sp|P35321|SPR1A_HUMAN	Cornifin-A OS=Homo sapiens GN=SPRR1A PE=1 SV=2	10	0.0555	0.0222
175	211	12.74	12.78	20.5	sp|Q9UKU9|ANGL2_HUMAN	Angiopoietin-related protein 2 OS=Homo sapiens GN=ANGPTL2 PE=2 SV=1	7	0.0492	0.0001
176	122	19.4	19.68	44.4	sp|Q9UBG3|CRNN_HUMAN	Cornulin OS=Homo sapiens GN=CRNN PE=1 SV=1	15	0.0453	<0.00001
177	220	12.1	12.67	59.1	sp|Q9H299|SH3L3_HUMAN	SH3 domain-binding glutamic acid-rich-like protein 3 OS=Homo sapiens GN=SH3BGRL3 PE=1 SV=1	13	0.0409	0.0001
178	57	29.78	29.53	55.6	sp|P29508|SPB3_HUMAN	Serpin B3 OS=Homo sapiens GN=SERPINB3 PE=1 SV=2	30	0.0377	<0.00001
179	43	35.76	44.08	52.6	sp|P13646|K1C13_HUMAN	Keratin, type I cytoskeletal 13 OS=Homo sapiens GN=KRT13 PE=1 SV=4	31	0.0373	<0.00001
180	110	20.76	20.74	92.6	sp|Q01469|FABP5_HUMAN	Fatty acid-binding protein, epidermal OS=Homo sapiens GN=FABP5 PE=1 SV=3	21	0.0296	<0.00001
181	519	4.02	4.02	14.6	sp|Q14847|LASP1_HUMAN	LIM and SH3 domain protein 1 OS=Homo sapiens GN=LASP1 PE=1 SV=2	2	0.0281	0.0044
182	359	6.76	6.91	31.9	sp|P05451|REG1A_HUMAN	Lithostathine-1-alpha OS=Homo sapiens GN=REG1A PE=1 SV=3	5	0.0258	0.0052
183	225	11.97	12.69	35.1	sp|P06870|KLK1_HUMAN	Kallikrein-1 OS=Homo sapiens GN=KLK1 PE=1 SV=2	13	0.0238	<0.00001
184	286	8.82	10.93	82.3	sp|P01617|KV204_HUMAN	Ig kappa chain V-II region TEW OS=Homo sapiens PE=1 SV=1	154	0.0146	0.0212
185	664	2.14	4.76	54.5	sp|P01616|KV203_HUMAN	Ig kappa chain V-II region MIL OS=Homo sapiens PE=1 SV=1	40	0.0145	0.0114
186	544	4	4	18.6	sp|P29972|AQP1_HUMAN	Aquaporin-1 OS=Homo sapiens GN=AQP1 PE=1 SV=3	5	0.0133	0.0213
187	751	2	2.1	9.2	sp|O95696|BRD1_HUMAN	Bromodomain-containing protein 1 OS=Homo sapiens GN=BRD1 PE=1 SV=1	3	0.0125	0.0136
188	439	5.26	5.34	53.2	sp|P00995|ISK1_HUMAN	Pancreatic secretory trypsin inhibitor OS=Homo sapiens GN=SPINK1 PE=1 SV=2	9	0.0113	0.0003
189	819	2	2	12.7	sp|Q92876|KLK6_HUMAN	Kallikrein-6 OS=Homo sapiens GN=KLK6 PE=1 SV=1	1	0.0112	0.0129
190	758	2	2.04	11	sp|P22314|UBA1_HUMAN	Ubiquitin-like modifier-activating enzyme 1 OS=Homo sapiens GN=UBA1 PE=1 SV=3	1	0.0107	0.0127
191	548	4	4	27.6	sp|O43653|PSCA_HUMAN	Prostate stem cell antigen OS=Homo sapiens GN=PSCA PE=1 SV=1	3	0.0101	0.0185
